# Supplementary material
Source: PubMed Central journal article supplement (PMC3114705)
Supplement: supp_138.7.1349_DEV056002TableS1.pdf [file supp_138.7.1349_DEV056002TableS1.pdf]

**Table S1. Subtle effects of *Ral* or *Ral*<sup>CA</sup> overexpression in R4**

| <b>Ommatidial phenotypes (five eyes)</b>                             |                    |                 |                  |
|----------------------------------------------------------------------|--------------------|-----------------|------------------|
| Genotype                                                             | Number symmetrical | Number reversed | Number wild type |
| (R3>R4) <i>Ral</i> <sup>PG69</sup> ; 1 <i>XUAS-Ral</i>               | 3                  | 0               | 1089             |
| <i>Ral</i> <sup>PG69</sup> ; 2 <i>XUAS-Ral</i>                       | 4                  | 0               | 1144             |
| (R3~R4) <i>ro-gal4</i> ; 1 <i>XUAS-Ral</i>                           | 4                  | 0               | 1037             |
| <i>ro-gal4</i> ; 2 <i>XUAS-Ral</i>                                   | 33                 | 3               | 1073             |
| (R3>R4) <i>Ral</i> <sup>PG69</sup> ; 1 <i>XUAS-Ral</i> <sup>CA</sup> | *Lethal            |                 |                  |
| (R3~R4) <i>ro-gal4</i> ; 1 <i>XUAS-Ral</i> <sup>CA</sup>             | 2                  | 0               | 1077             |
| <i>ro-gal4</i> ; 2 <i>XUAS-Ral</i> <sup>CA</sup>                     | 32                 | 6               | 1006             |

\*Overexpression of *Ral*<sup>CA</sup> outside of the eye with *Ral*<sup>PG69</sup> is lethal. Expression of *Ral*<sup>CA</sup> with *ro-gal4* is eye specific, and thus viable flies are obtained.
